# Supplementary material for: An AIE probe for the fluorescence and colorimetric sensing of La 3+
Source: Royal Society of Chemistry journal article supplement (doi:10.1039/d4ra01445f), 2024-01-01
Supplement: d4ra01445f1.pdf [file d4ra01445f1.pdf]

## An AIE probe for fluorescence and colorimetric sensing of La<sup>3+</sup>

Wan-Ying Lin<sup>4,5†</sup>, Zi-Ao Zong<sup>1,3,†,\*</sup>, Jing Wang<sup>3</sup>, Qi Huang<sup>6</sup>, Zhi-Yong Xing<sup>3</sup>, Chuan-Bin Fan<sup>1,\*</sup>,

Na-Na Li<sup>2,\*</sup>

<sup>1</sup>School of Laboratory Medicine, Youjiang Medical University for Nationalities, Baise, China

<sup>2</sup>Department of Chemistry, Xinzhou Normal University, Xinzhou, China

<sup>3</sup> Key Laboratory of Research on Environment and Population Health in aluminium mining areas (Youjiang Medical University for Nationalities), Education Department of Guangxi Zhuang Autonomous Region, Baise, China.

<sup>4</sup>Affiliated Hospital of Youjiang Medical University for Nationalities, Baise, China

<sup>5</sup>Guangxi Key Laboratory for Biomedical Material Research, Baise, China

<sup>6</sup>Baise Center for Disease Control and Prevention, Baise, China

\*Correspondence: zongziao@126.com (Z.-A. Z.); [LMT13643562571@126.com](mailto:LMT13643562571@126.com) (N.-N. Li)

† These authors contributed equally to this work.

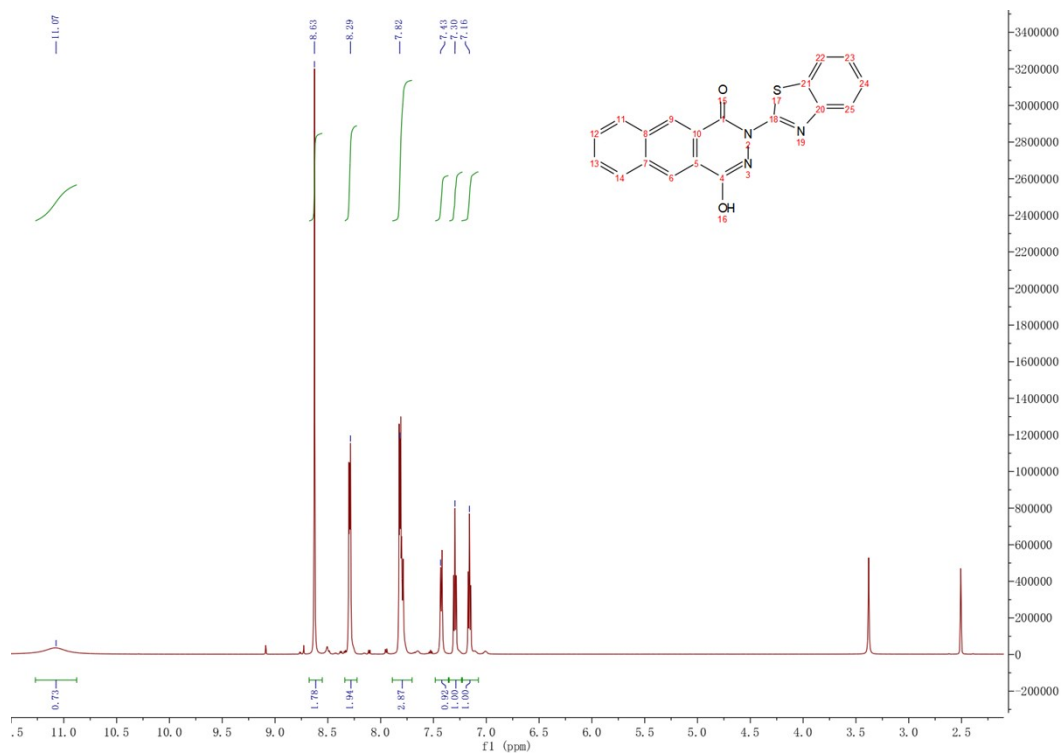

Figure S1 <sup>1</sup>H NMR spectra of compound N.

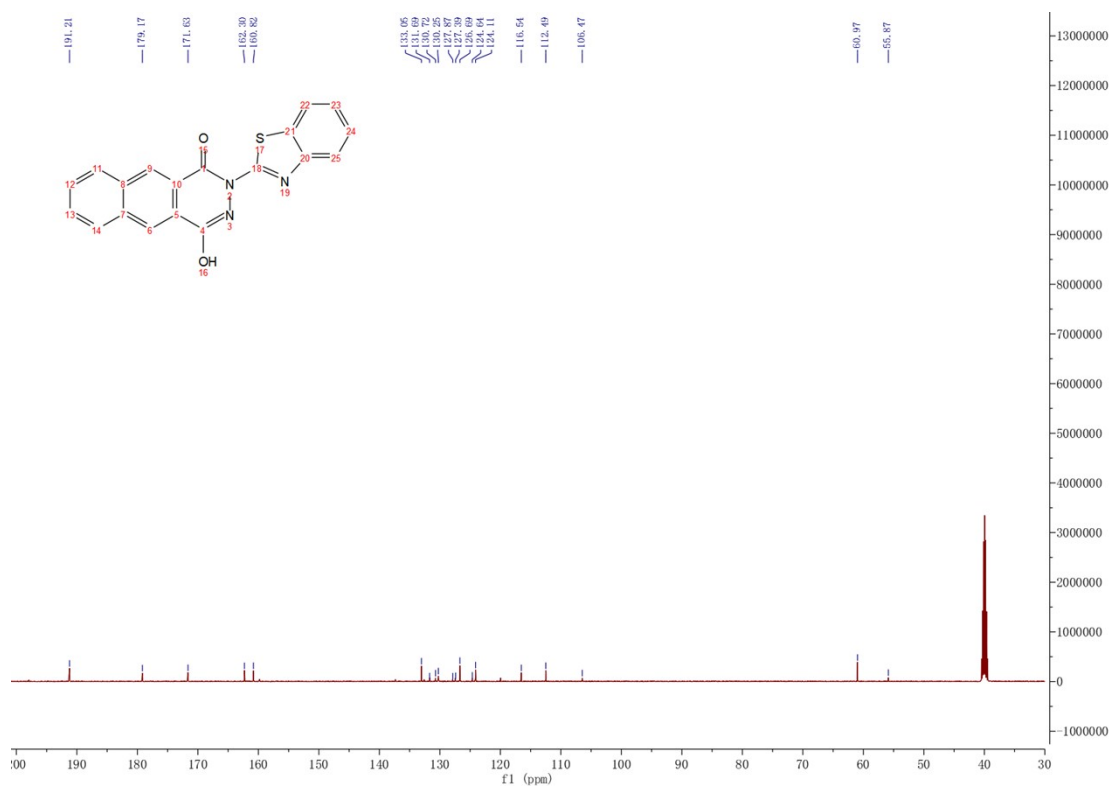

Figure S2 <sup>13</sup>C NMR spectra of compound N.

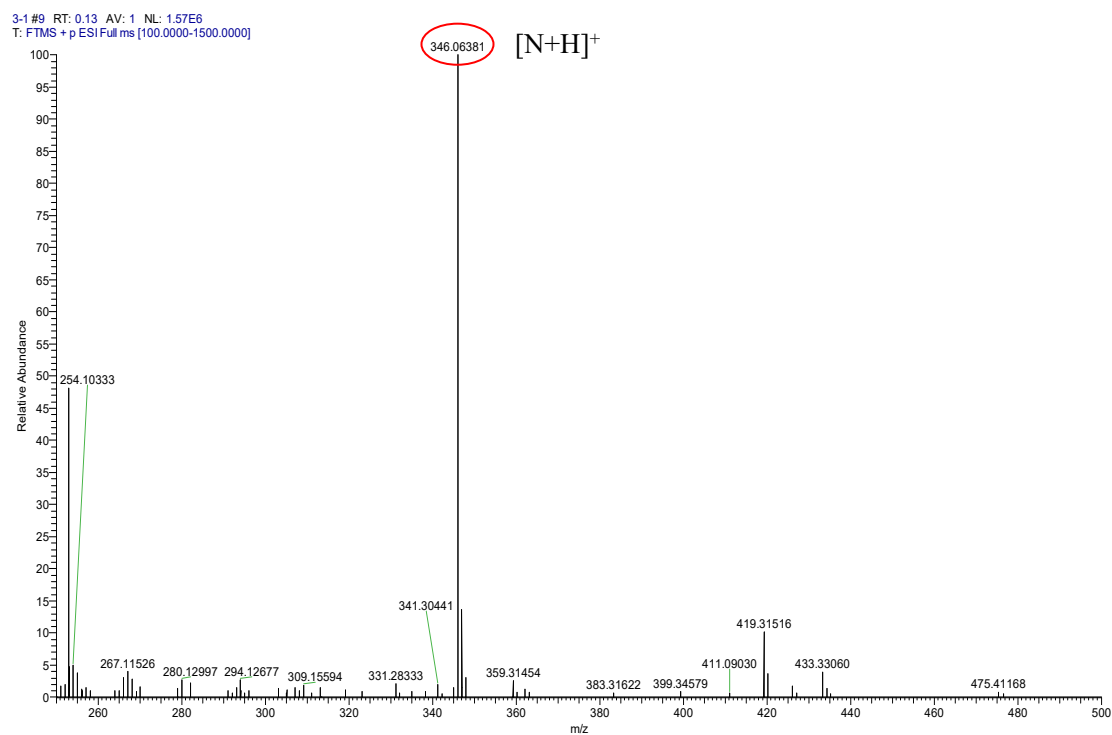

Figure S3 ESI-MS spectrum of probe N.

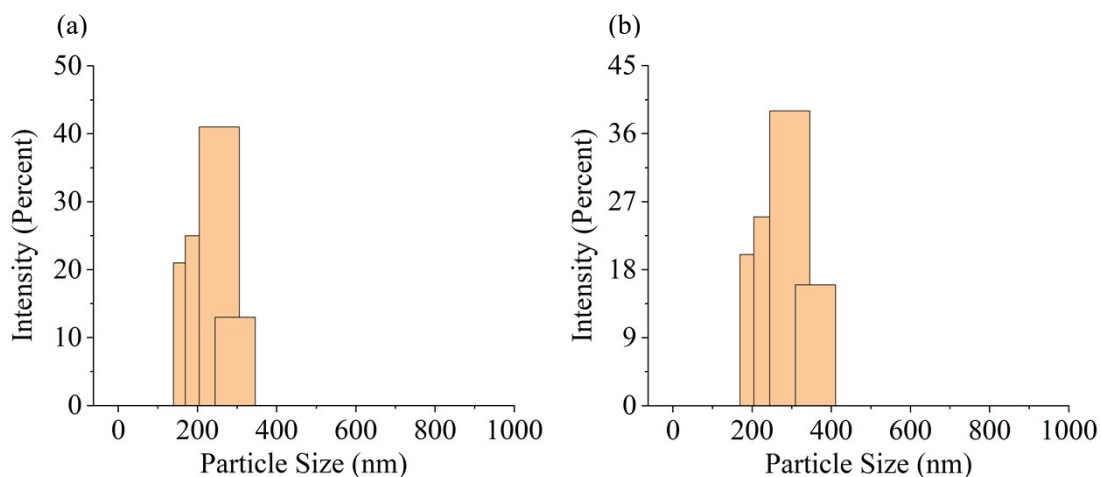

Figure S4 Particle size distributions of NMH in (a) EtOH and (b) EtOH/H<sub>2</sub>O (1/9, v/v).

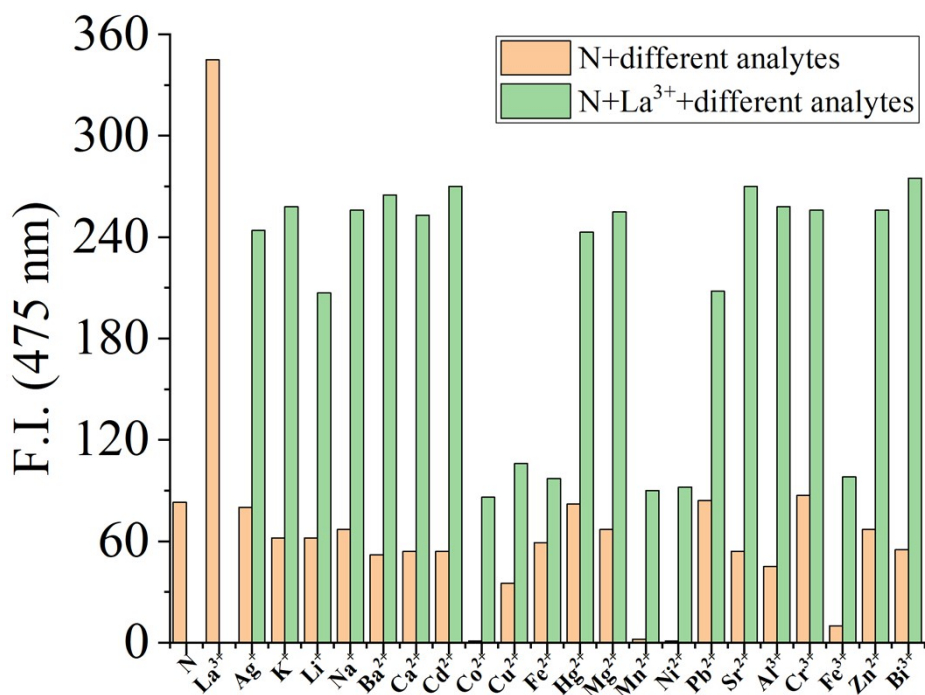

Figure S5 The fluorescence intensity a of probe N (10 μM) in the presence of La<sup>3+</sup> (50 μM) and additional other metal ions (50 μM) in H<sub>2</sub>O/EtOH (9/1, v/v, pH=7.4) medium.

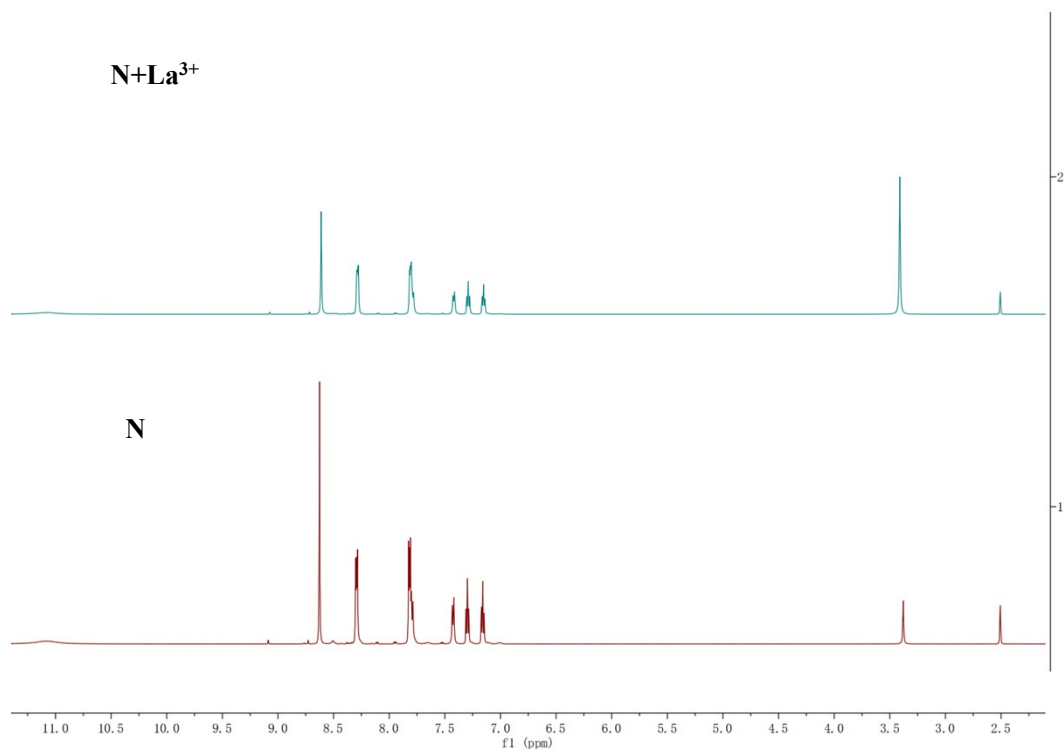

Figure S6  $^1\text{H}$  NMR ( $\text{DMSO-}d_6$ , 600 MHz) spectra of probe **N** and  $\text{N/La}^{3+}$  system.

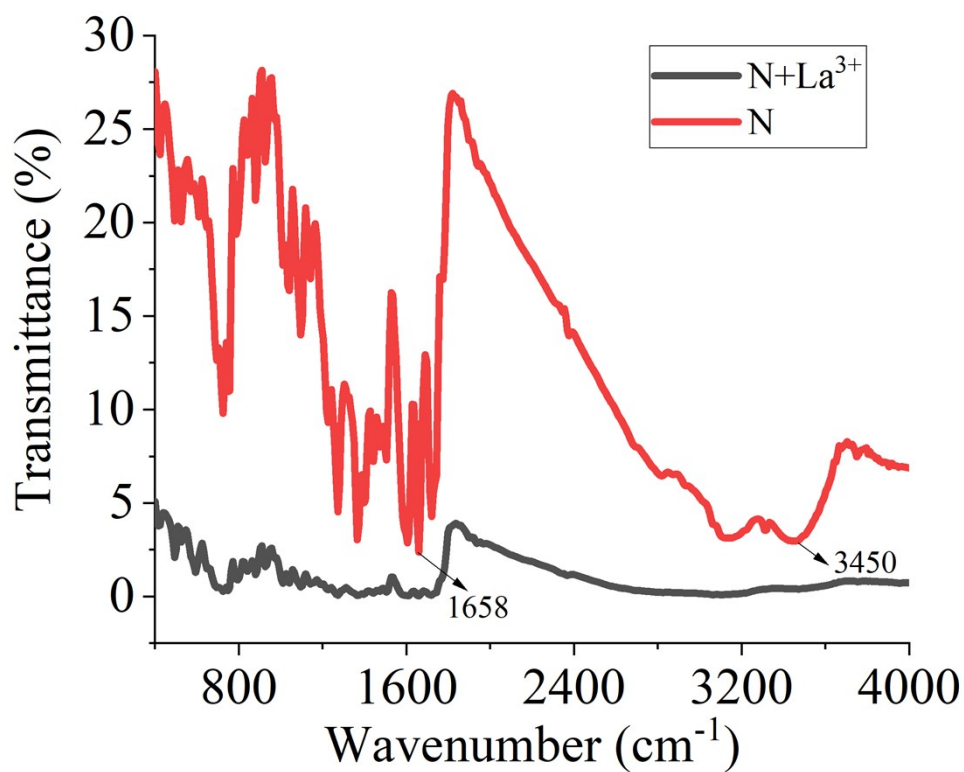

Figure S7 FT-IR spectra of probe **N** and  $\text{N/La}^{3+}$ .

3-2 #11 RT: 0.16 AV: 1 NL: 3.10E5  
T: FTMS + p ESI Full ms [100.0000-1500.0000]

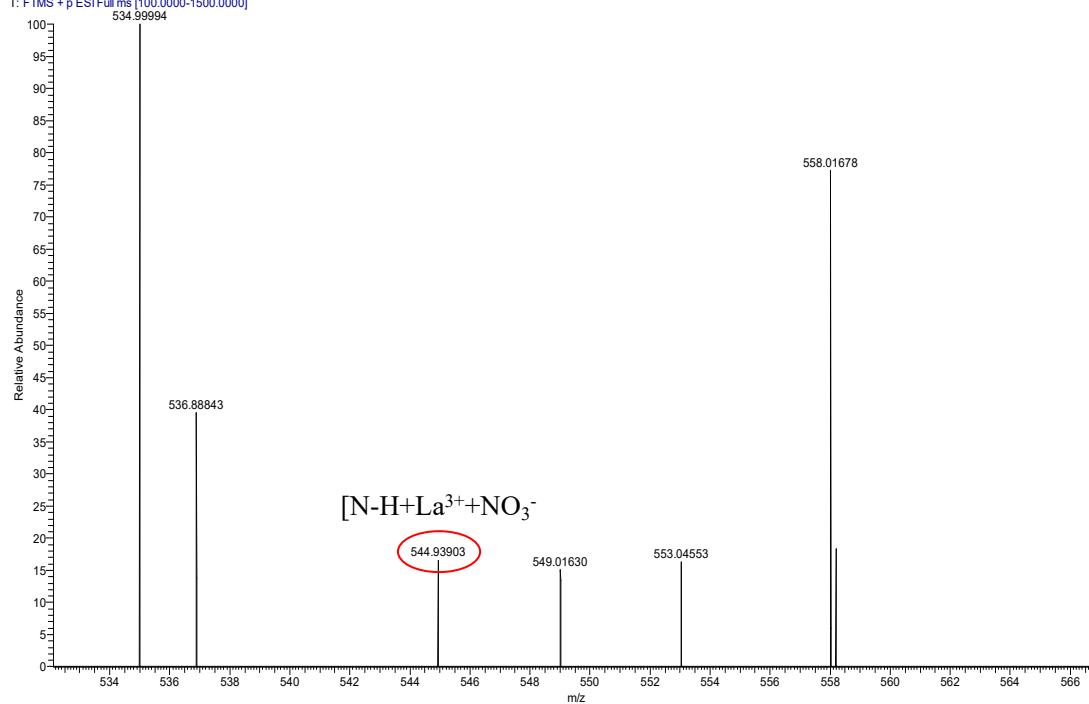

Figure S8 ESI-MS spectrum of N/La<sup>3+</sup>.

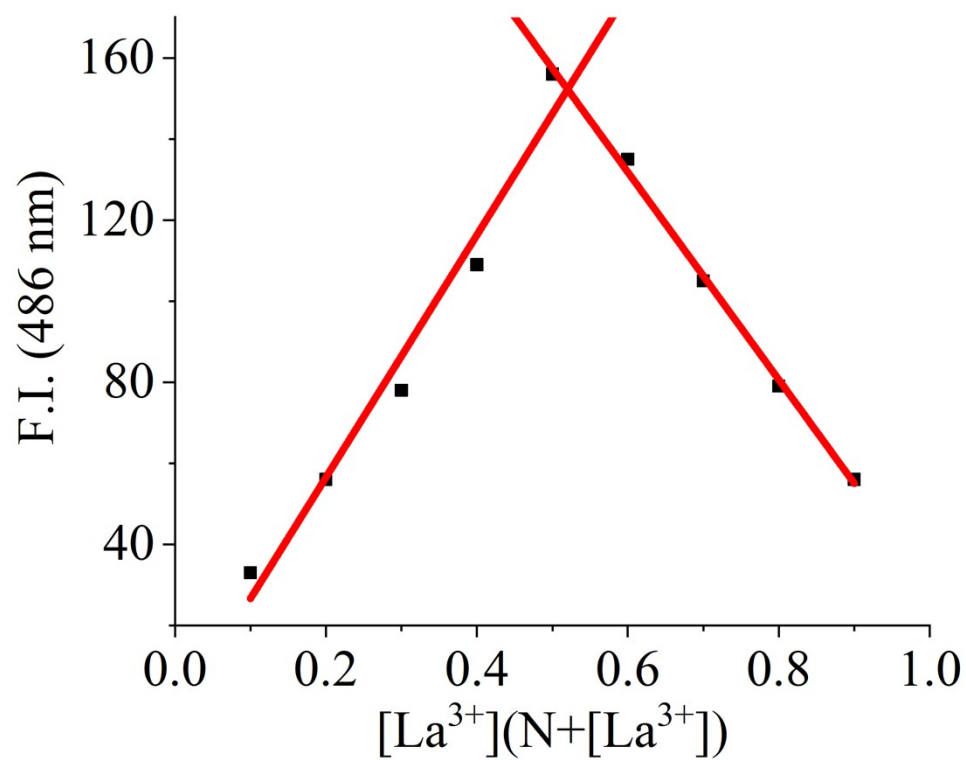

Figure S9 Job's plot of N/La<sup>3+</sup> system in EtOH/H<sub>2</sub>O (1/9, v/v, pH=7.4) medium

**Table 1** Comparison of diverse aspects of La<sup>3+</sup> fluorescence probes.

| Ref.      | probe molecules                                                                   | Response Mode                | Media                                             | application           |
|-----------|-----------------------------------------------------------------------------------|------------------------------|---------------------------------------------------|-----------------------|
| [31]      | 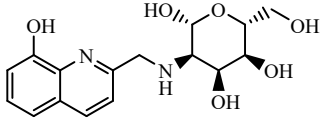 | fluorescence<br>“turn on”    | HEPES buffer                                      | HepG2 cells image     |
| [35]      |  | fluorescence<br>“turn on”    | CH <sub>3</sub> CN/H <sub>2</sub> O<br>(2/1, v/v) | None                  |
| This work |  | fluorescence<br>colorimetric | EtOH/H <sub>2</sub> O<br>(9/1, v/v)               | Solid state detection |
